# Supplementary material for: Changes in the anticitrullinated peptide antibody response in relation to therapeutic outcome in early rheumatoid arthritis: results from the SWEFOT trial
Source: PubMed Central journal article supplement — Ann Rheum Dis. 2014 Dec 30;75(2):356–61. doi: 10.1136/annrheumdis-2014-205698 (PMC4752667; doi:10.1136/annrheumdis-2014-205698), 2014-12-30
Supplement: annrheumdis-2014-205698-s1.pdf [file annrheumdis-2014-205698-s1.pdf]

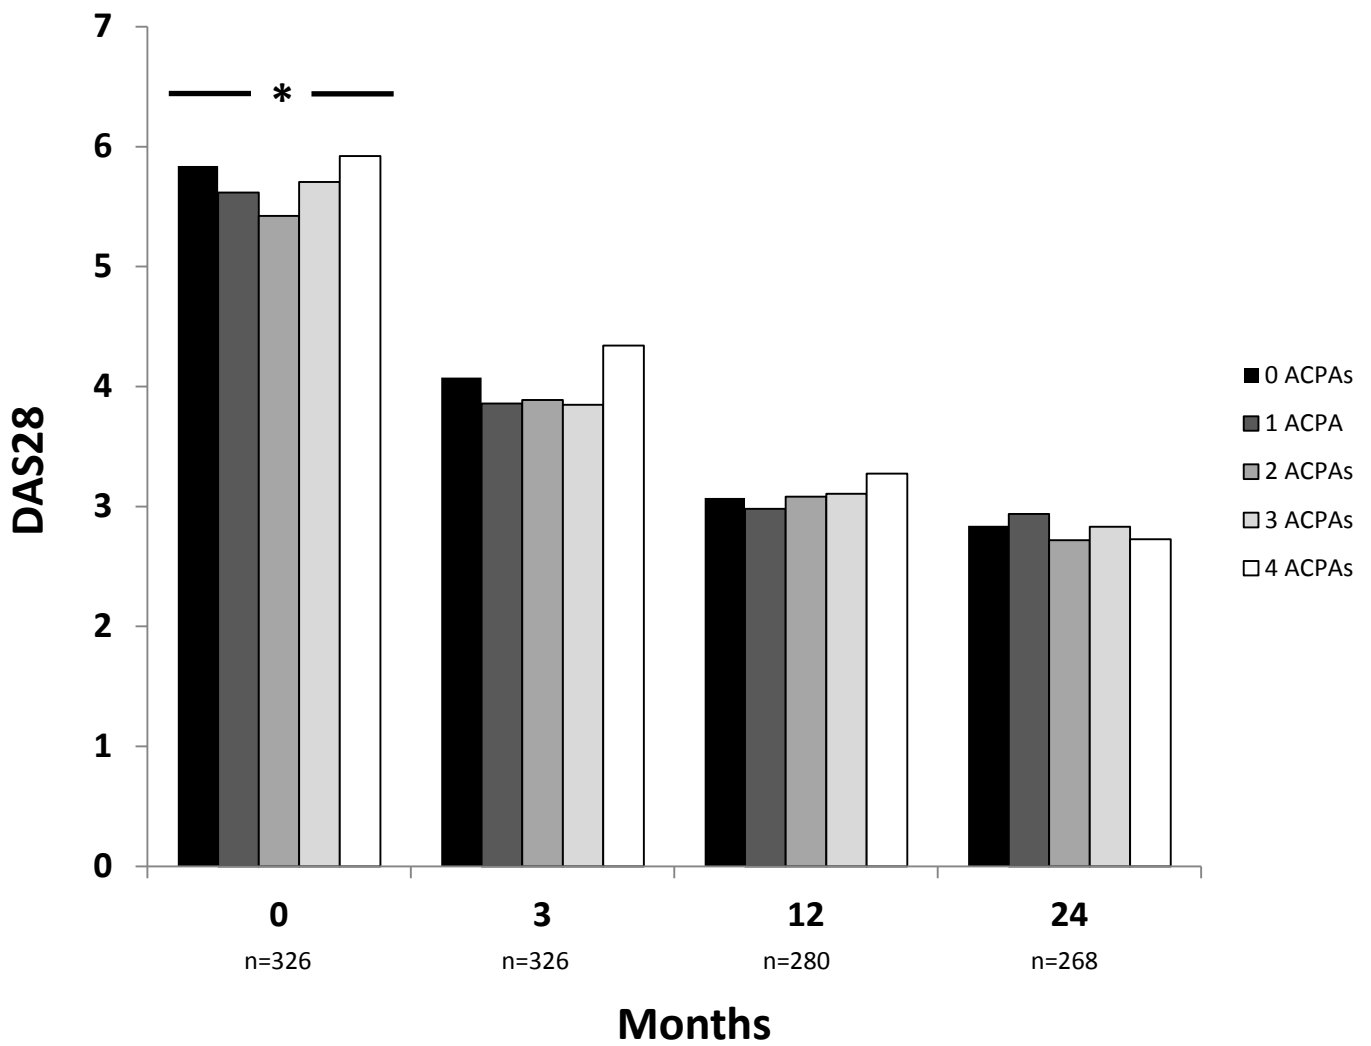

**Supplementary figure S1.** Number of ACPA specificities present at baseline in relation to DAS28 over time in early RA. \* p=0.035 by one-way ANOVA. DAS28 = 28-joint disease activity score; ACPA = Anti-citrullinated protein antibody
