# Supplementary material for: Changes in the anticitrullinated peptide antibody response in relation to therapeutic outcome in early rheumatoid arthritis: results from the SWEFOT trial
Source: PubMed Central journal article supplement — Ann Rheum Dis. 2014 Dec 30;75(2):356–61. doi: 10.1136/annrheumdis-2014-205698 (PMC4752667; doi:10.1136/annrheumdis-2014-205698), 2014-12-30
Supplement: annrheumdis-2014-205698-s2.pdf [file annrheumdis-2014-205698-s2.pdf]

**Supplementary table S1.** Relative changes in antibody levels in early rheumatoid arthritis, and their correlations to changes in disease activity and inflammatory markers. CCP: cyclic citrullinated peptide; CEP-1: citrullinated  $\alpha$ -enolase peptide-1; cFib: citrullinated fibrinogen peptide; CRP = C-reactive protein; cVim: citrullinated vimentin peptide; DAS28 = 28-joint disease activity score; ESR = Erythrocyte sedimentation rate; IQR: interquartile range. Statistically significant correlations are shown in bold.

**A. Months 0-3; Methotrexate monotherapy**

|                                 |         | CCP (n=209)           | CEP-1 (n=124)          | cVim (n=91)           | cFib (n=88)          |
|---------------------------------|---------|-----------------------|------------------------|-----------------------|----------------------|
| <b>Change in antibody level</b> |         |                       |                        |                       |                      |
| Median % (IQR)                  |         | -28.2 (-3.9 to -44.4) | -30.0 (-12.5 to -47.2) | -28.6 (-8.5 to -38.8) | -28.0 (4.2 to -47.6) |
| <b>ESR</b>                      | Rho     | 0.11                  | <b>0.21</b>            | 0.19                  | <b>0.24</b>          |
|                                 | P-value | 0.11                  | <b>0.017</b>           | 0.071                 | <b>0.022</b>         |
| <b>CRP</b>                      | Rho     | 0.03                  | 0.07                   | -0.02                 | <b>0.22</b>          |
|                                 | P-value | 0.65                  | 0.45                   | 0.89                  | <b>0.041</b>         |
| <b>DAS28</b>                    | Rho     | <b>0.16</b>           | 0.10                   | 0.17                  | 0.16                 |
|                                 | P-value | <b>0.025</b>          | 0.27                   | 0.11                  | 0.15                 |

**B. Months 3-12; Add-on therapy**

|                                 |         | CCP (n=115)         | CEP-1 (n=58)         | cVim (n=41)         | cFib (n=46)          |
|---------------------------------|---------|---------------------|----------------------|---------------------|----------------------|
| <b>Change in antibody level</b> |         |                     |                      |                     |                      |
| Median % (IQR)                  |         | -26.1 (13 to -51.2) | -29.1 (0.2 to -48.2) | -23.0 (-2 to -35.5) | -28.0 (4.2 to -47.6) |
| <b>ESR</b>                      | Rho     | 0.13                | <b>0.27</b>          | 0.03                | <b>0.37</b>          |
|                                 | P-value | 0.19                | <b>0.040</b>         | 0.87                | <b>0.012</b>         |
| <b>CRP</b>                      | Rho     | -0.01               | 0.09                 | 0.07                | 0.29                 |
|                                 | P-value | 0.91                | 0.51                 | 0.67                | 0.13                 |
| <b>DAS28</b>                    | Rho     | <b>0.21</b>         | 0.18                 | 0.25                | <b>0.35</b>          |
|                                 | P-value | <b>0.027</b>        | 0.17                 | 0.12                | <b>0.016</b>         |
